# Supplementary material
Source: bioRxiv or medRxiv preprint supplement (https://www.biorxiv.org/highwire/filestream/117062/field_highwire_adjunct_files/0/384958-1.pdf)
Supplement: Supplementary file [file 384958-1.pdf]

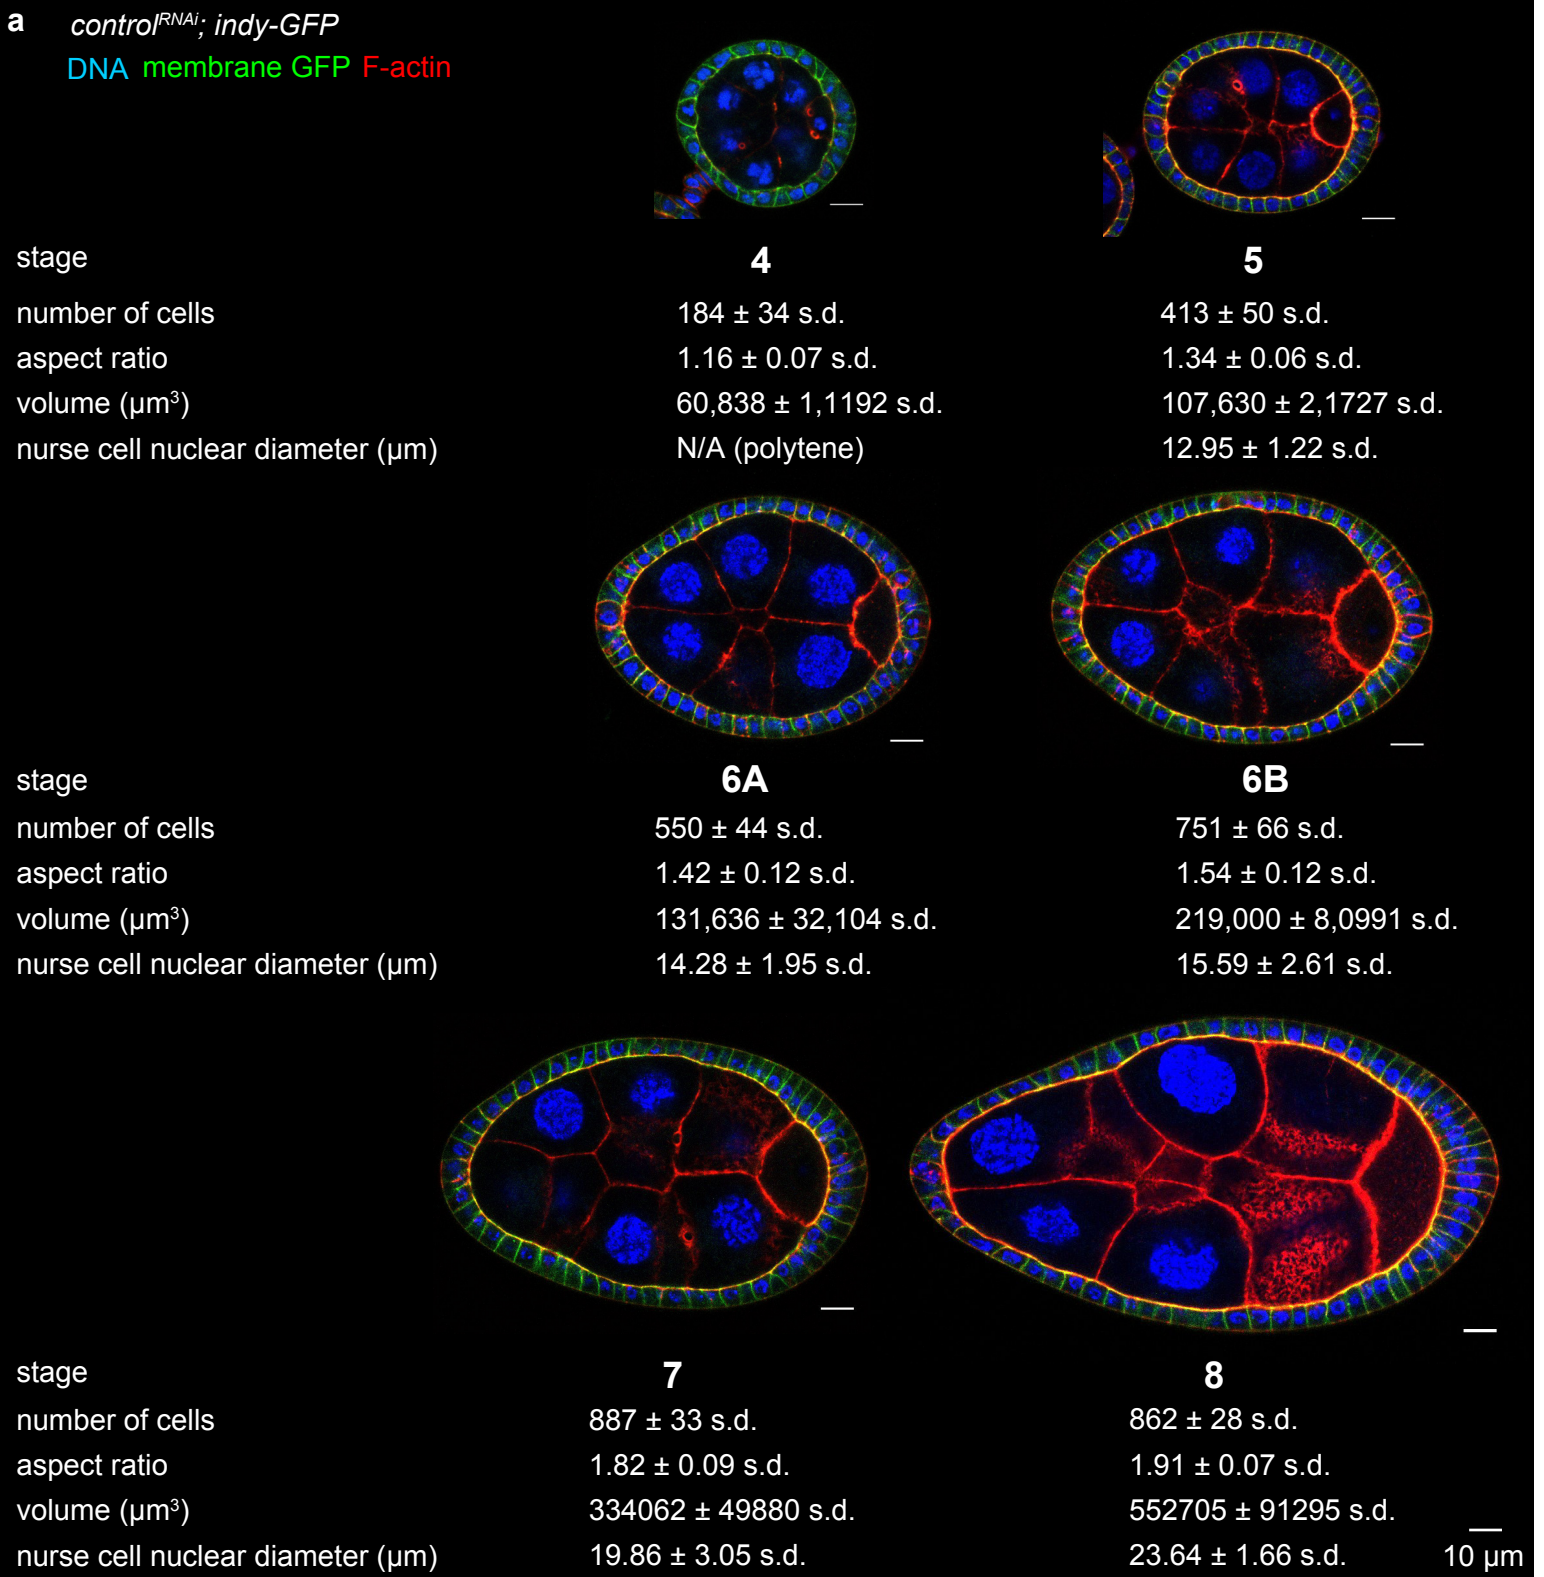

**b**

| Stage | Duration by Lin&Spradling (h) | Duration by David&Merle (h) | Approx. range of follicle cell number | Approx. range of nurse cell nucleus diameter ( $\mu\text{m}$ ) |
|-------|-------------------------------|-----------------------------|---------------------------------------|----------------------------------------------------------------|
| 4     | 6                             | 9.16                        | 125-300                               | N/A (polytene)                                                 |
| 5     | 5                             | 2.61                        | 300-500                               | 11-14                                                          |
| 6A    | 3                             | 8.45                        | 500-650                               | 14-15                                                          |
| 6B    |                               |                             | 650-850                               | 15-17                                                          |
| 7     | 6                             | 8.69                        | 850+                                  | 17-21                                                          |
| 8     | 6                             | 5.21                        | 850+                                  | 21+                                                            |

**Supplementary Fig. 1**

**Supplementary Figure 1| a**, Morphometric data for follicles staged by cell number, which generally correlate with classic morphological criteria. Values shown are average  $\pm$  standard deviation (s.d.) **b**, Table showing durations of stages according to Lin and Spradling (1993) deduced from single ovariole transplants into *ovoD1* female hosts, or David and Merle (1968) deduced from representation of follicle stages in WT hosts; Approximate range of follicle cell number and nurse cell nucleus diameter for suggested staging.

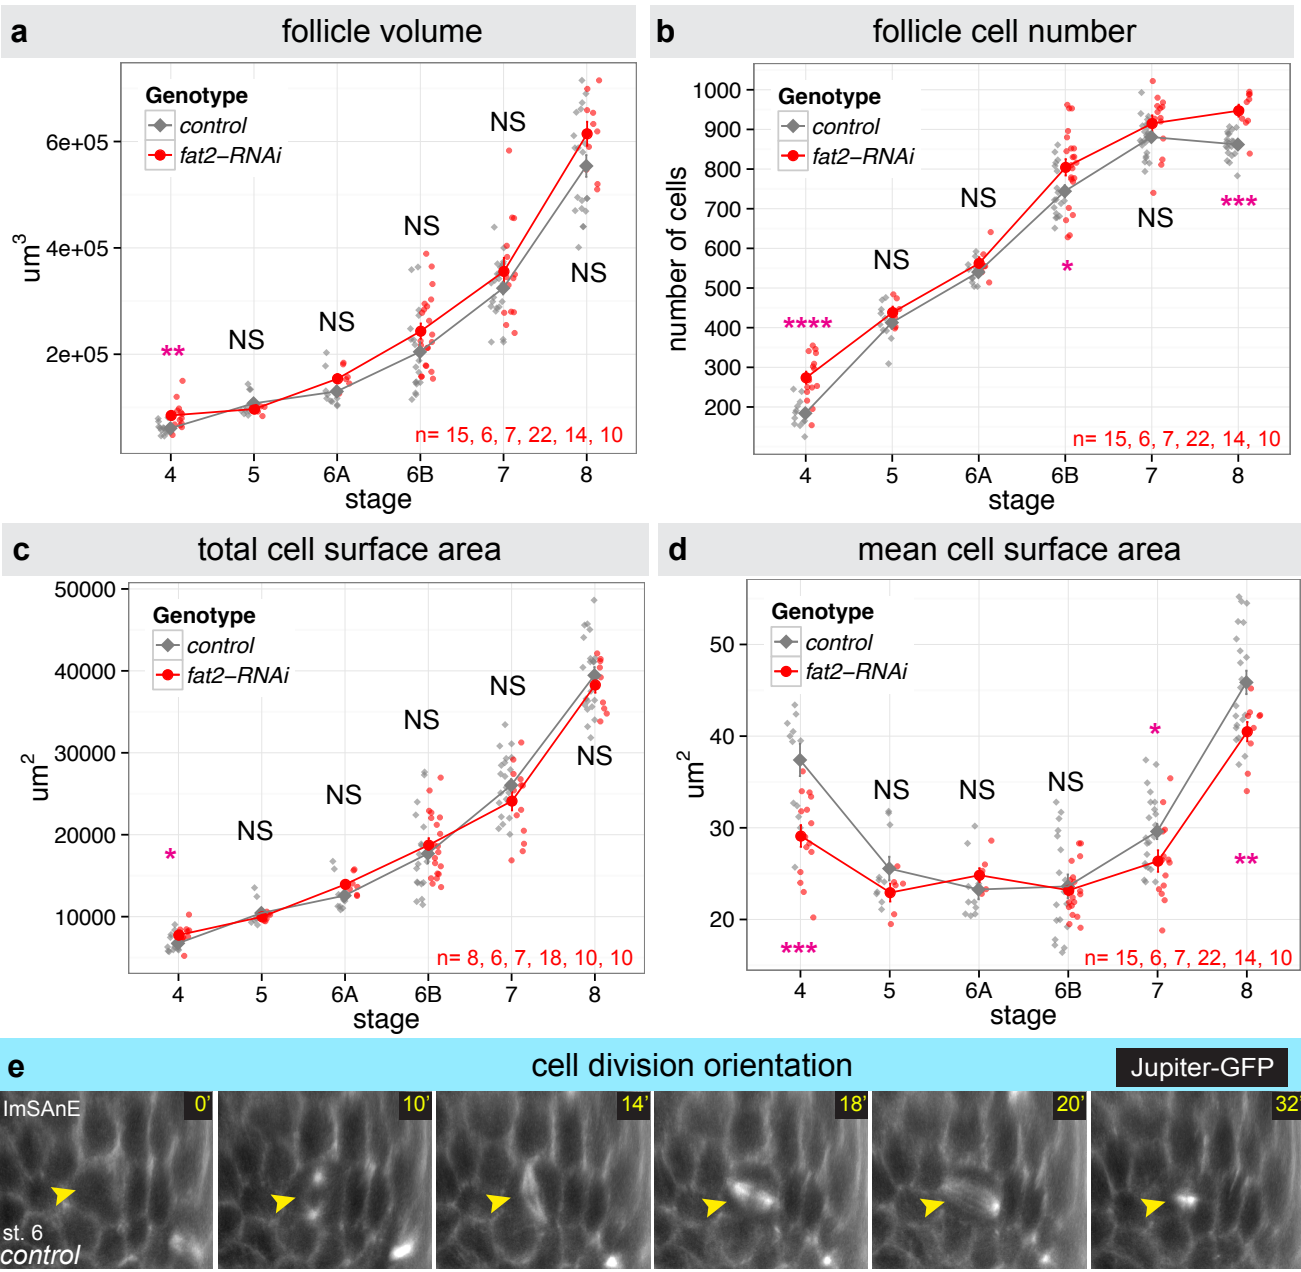

Supplementary Fig. 2

**Supplementary Figure 2| a-d**, Further morphometric data of follicle volume(**a**), cell number(**b**), total cell surface area(**c**), and mean cell surface area(**d**) comparing control to *fat2*-depleted follicles. **e**, Example from ImSAnE cylinder projection showing mitotic spindle (yellow arrowhead) in control st.6 follicle rotating from initial latitudinal orientation to final AP-oriented cell division (see also **Video 3**). n, Sample size. NS, not significant, \*P<0.5, \*\*P<0.01, \*\*\*P<0.001. Error bars, s.e.m.

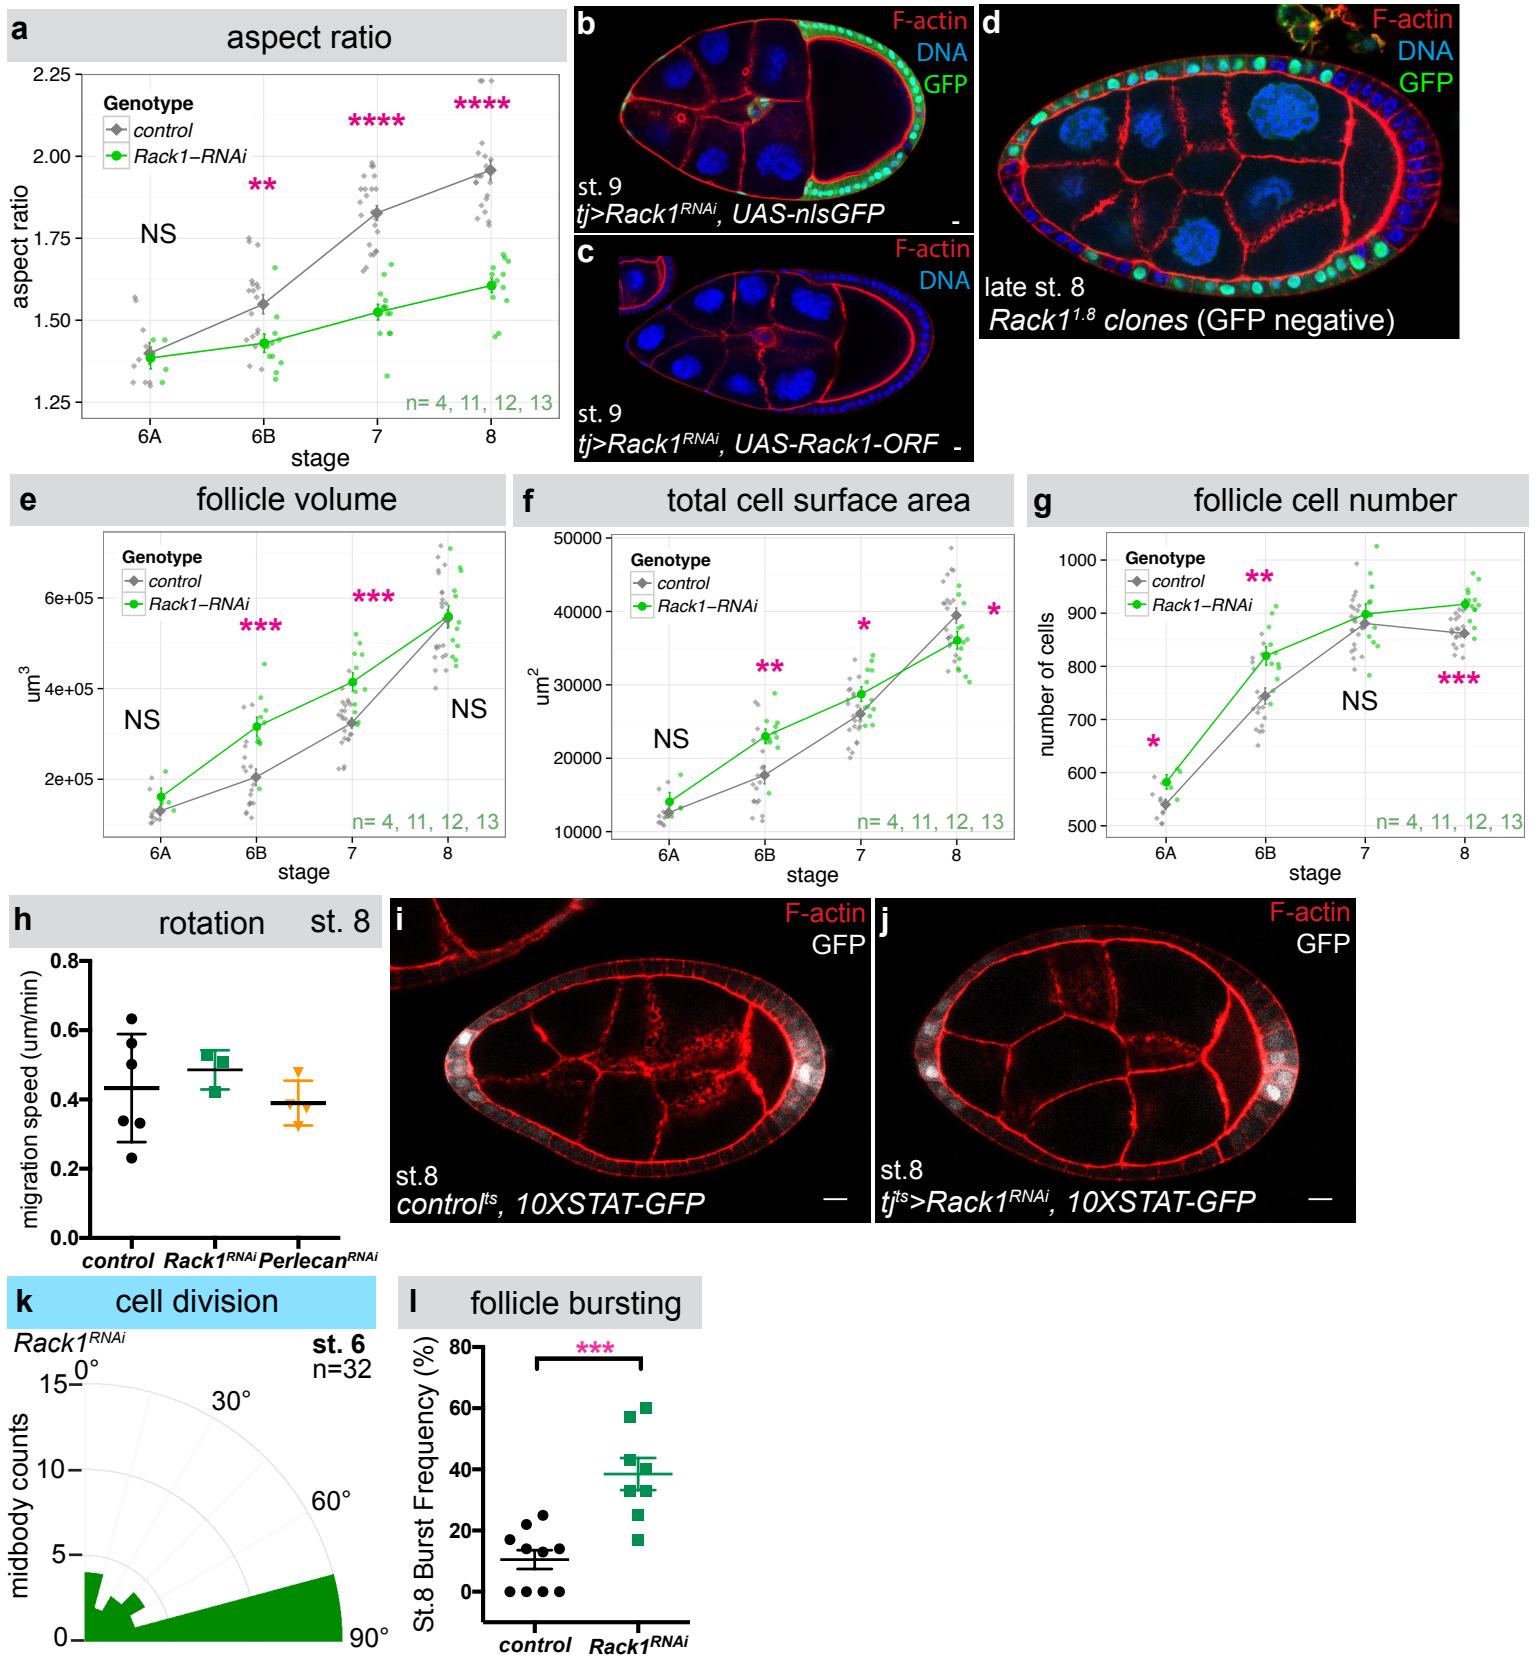

Supplementary Fig. 3

**Supplementary Figure 3| a**, Elongation of *Rack1*-depleted follicles diverges from control at st. 6B. **b-c**, *Rack1*-depleted round follicle phenotype is rescued by overexpression of the *Rack1*-ORF. **d**, Mitotic clones of a *Rack1* null allele (marked by absence of GFP) perturb elongation. **e-g**, Further morphometric data of follicle volume(**e**), total cell surface area(**f**), and follicle cell number(**g**) comparing control to *Rack1*-depleted follicles. **h**, Both *Rack1* and *Perlecan*-depleted follicles undergo rotation (see also **Video 4**). **i-j**, *Rack1*-depleted follicles show normal STAT activity gradients(gray) at poles, and **k**, undergo oriented cell divisions at st. 6 (n=32) similar to control. **l**, Bursting frequency under osmotic stress is increased compared to control follicles. n, Sample size. NS, not significant, \*P<0.5, \*\*P<0.01, \*\*\*P<0.001, \*\*\*\*P<0.0001.

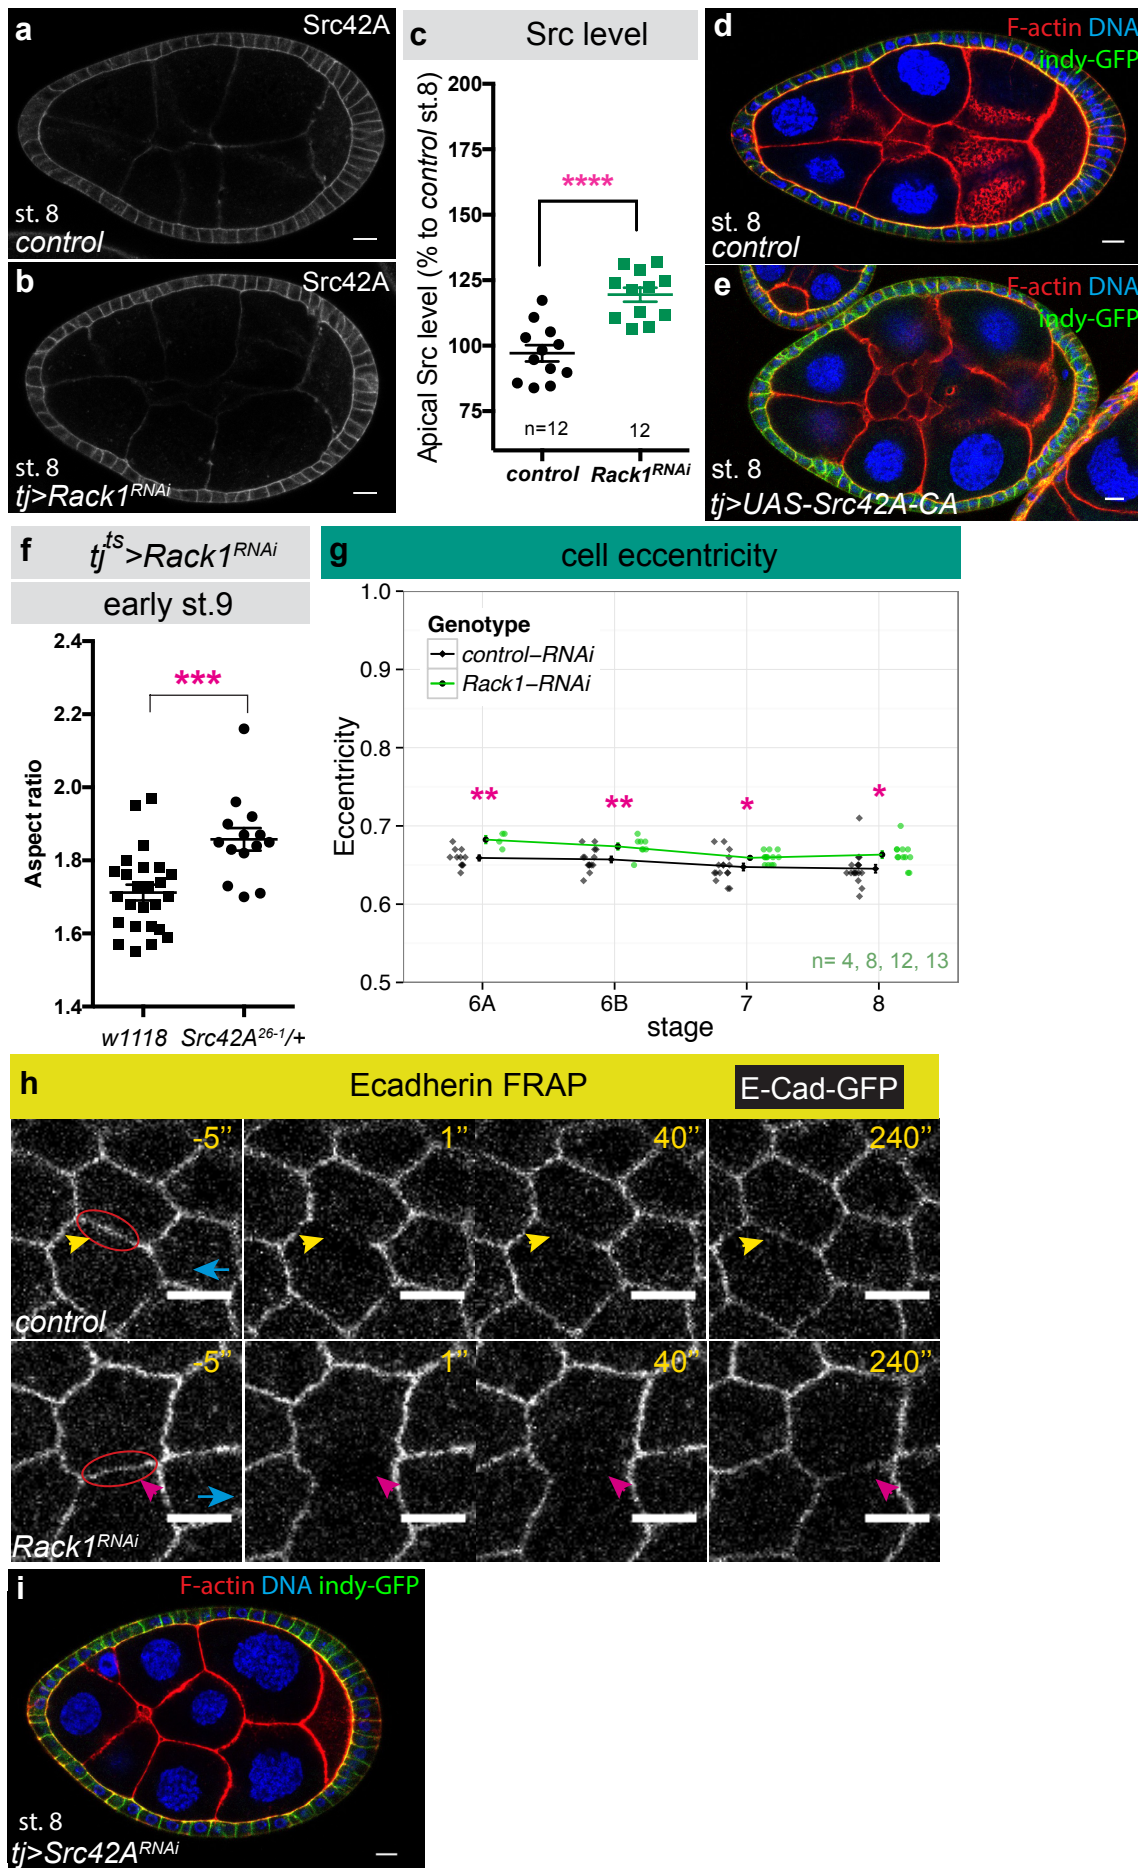

Supplementary Fig. 4

**Supplementary Figure 4| a-c**, Levels of total Src42A protein (gray) are increased in *Rack1*-depleted follicles. **d-e**, Hyperactivation of Src42A, like its depletion, impairs follicle elongation. **f**, Heterozygosity for *Src42A* partially suppresses elongation defects of *Rack1*-depleted follicles. **g**, Cell eccentricity is slightly increased when *Rack1* is depleted. **h**, FRAP recovery is not through lateral diffusion. Yellow and magenta arrows mark photobleached junctions; blue arrows indicate direction of follicle rotation. **i**, *Src42A*-depleted follicle has impaired follicle elongation. n, Sample size. Scale bars, 100  $\mu$ m. \*P<0.5, \*\*P<0.01, \*\*\*P<0.001, and \*\*\*\*P<0.0001.
